# Supplementary material for: Non-rapid eye movement sleep and wake neurophysiology in schizophrenia
Source: eLife. 2022 May 17;11:e76211. doi: 10.7554/eLife.76211 (PMC9113745; doi:10.7554/eLife.76211)
Supplement: Supplementary file 1. [file elife-76211-supp1.docx]

**Supplemental file 1**

**Non-rapid eye movement sleep and wake neurophysiology in schizophrenia**

**Authors:** Nataliia Kozhemiako1†, Jun Wang2†, Chenguang Jiang2†, Lei A. Wang3, Guan-chen Gai2, Kai Zou2, Zhe Wang2, Xiao-man Yu2, Lin Zhou3, Shen Li4, Zhenglin Guo3, Robert G. Law1, James Coleman3, Dimitrios Mylonas5, Lu Shen7, Guoqiang Wang2, Shuping Tan6, Shengying Qin7, Hailiang Huang3,8, Michael Murphy4, Robert Stickgold9,10, Dara S. Manoach5, Zhenhe Zhou2•, Wei Zhu2•, Mei-Hua Hall4•, Shaun M. Purcell1,10•* & Jen Q. Pan3•*

**Affiliations:**

1. Department of Psychiatry, Brigham and Women’s Hospital, Harvard Medical School; Boston, USA
2. The Affiliated Wuxi Mental Health Center of Nanjing Medical University; Wuxi, China
3. Stanley Center for Psychiatric Research, Broad Institute of MIT and Harvard; Boston, USA
4. Department of Psychiatry, McLean Hospital, Harvard Medical School; Boston, USA
5. Department of Psychiatry, Massachusetts General Hospital, Harvard Medical School; Boston, USA
6. Huilong Guan Hospital, Beijing University; Beijing China
7. Bio-X Institutes, Shanghai Jiao Tong University; Shanghai China
8. ATGU, MGH, Harvard Medical School; Boston, USA
9. Beth Israel Deaconess Medical Center; Boston, USA
10. Department of Psychiatry, Harvard Medical School; Boston, USA

† - co-first authors; • - co-senior authors

* - corresponding authors (Jen Q. Pan, jpan@broadinstitute.org ; Shaun M. Purcell, smpurcell@bwh.harvard.edu)

***Supplementary file 1: Group differences in EEG parameters between SCZ and CTR***

| **Sleep microstructure metrics** | **SCZ**  **Mean ± SD(min, max)** | **CTR**  **Mean ± SD(min, max)** | **Number of channels with padj<0.05** | **Significant padj range** | **Effect size across channels with padj<0.05** |
| --- | --- | --- | --- | --- | --- |
| ***SS density, n/min*** | 1.3±0.49 (0.7–2.1) | 1.5±0.47 (0.9-2.2) | 20 | 3e-04 - 0.0117 | -0.79 - -0.6 |
| ***SS amplitude, uV*** | 24.4±6.73 (16.9–33.3) | 28.6±6.73 (20-37.5) | 49 | 3e-04 - 0.0467 | -0.82 - -0.43 |
| ***SS ISA, a.u.*** | 1.3±0.24 (1.2–1.5) | 1.5±0.2 (1.3-1.7) | 34 | 3e-04 - 0.048 | -0.96 - -0.63 |
| SS duration, s | 0.9±0.09 (0.8–0.9) | 0.9±0.07 (0.8-0.9) | 0 |  |  |
| SS chirp, a.u. | -0.23±0.151 (-0.31–-0.14) | -0.25±0.117 (-0.34--0.15) | 0 |  |  |
| SS frequency, Hz | 11.1±0.41 (10.9–11.2) | 11.2±0.48 (11-11.4) | 0 |  |  |
| **FS density, n/min** | 1.7±0.82 (1–2.6) | 2.4±0.8 (1.4-3.3) | 53 | 3e-04 - 0.0443 | -1.27 - -0.56 |
| **FS amplitude, uV** | 17.2±4.62 (11.8–23) | 19.5±5.3 (12.4-27.1) | 22 | 0.0013 - 0.0457 | -0.62 - -0.41 |
| **FS ISA, a.u.** | 1.3±0.18 (1.2–1.4) | 1.4±0.15 (1.3-1.5) | 1 | 0.0373 | -0.73 |
| **FS duration, s** | 0.8±0.09 (0.7–0.8) | 0.8±0.07 (0.8-0.9) | 35 | 0.0057 - 0.0477 | -0.98 - -0.69 |
| **FS chirp, a.u.** | -0.22±0.109 (-0.27–-0.16) | -0.17±0.101 (-0.25--0.09) | 20 | 0.0027 - 0.0437 | -1.09 - -0.59 |
| FS frequency, Hz | 13.8±0.37 (13.6–13.9) | 13.7±0.37 (13.4-13.8) | 0 |  |  |
| **SO density, n/min** | 13.3±2.16 (11.9–14.6) | 12.3±1.68 (10.1-13.7) | 30 | 3e-04 - 0.0483 | 0.59 - 1.16 |
| **SO duration, s** | 1.1±0.22 (0.9–1.3) | 1±0.14 (0.8-1.1) | 36 | 3e-04 - 0.033 | 0.66 - 1.92 |
| **SO slope, a.u.** | 171.1±42.04 (107.9–249.2) | 208.3±48.59 (122.7-323.2) | 44 | 3e-04 - 0.0377 | -1.14 - -0.55 |
| SO neg peak amplitude, uV | 36.2±8.37 (25.5–49.2) | 38.5±8.7 (25-54.4) | 0 |  |  |
| SO peak-to-peak amplitude, uV | 61.3±13.96 (43.9–80.9) | 64±13.8 (42.2-88.9) | 0 |  |  |
| SS SO coupling strength, z | 2.4±2.37 (0.8–4.5) | 2.8±2.34 (1.2-4.6) | 0 |  |  |
| **SS SO coupling overlap, z** | 2.1±1.08 (1.2–2.8) | 2.7±0.91 (1.7-3.4) | 13 | 0.0063 - 0.046 | -1.14 - -0.62 |
| **SO phase angle when SS occur,°** | 352.5±70.01 (326.7–374.9) | 373.8±56.91 (354.5-389.9) | 2 | 3e-04 - 0.019 | -1.07 - -1 |
| FS SO coupling strength, z | 6.7±4.06 (3.8–9.5) | 5.8±2.97 (3.6-8) | 0 |  |  |
| FS SO coupling overlap, z | 2.9±1.26 (2.2–3.4) | 2.9±1.03 (1.9-3.5) | 0 |  |  |
| **SO phase angle when FS occur,°** | 233±22.52 (218.8–241.7) | 240.8±26.8 (220.6-252.2) | 2 | 0.045 - 0.0497 | -0.65 - -0.41 |
| **MMN Amplitude, uV** | 1.3±0.98 (2–0.6) | 1.6±0.99 (2.6-0.6) | 1 | 0.012 | -0.7 |
| MMN Latency, s | 180.7±25.65 (179–183.8) | 182.3±26.65 (178.7-186.2) | 0 |  |  |
| **P50 S2/S1 ratio** | 0.8±0.4 (0.7–1) | 0.6±0.39 (0.4-0.8) | 10 | 0.001 - 0.044 | 0.62 - 1.06 |
| P50 S1 amplitude, uV | 2.1±1.04 (1.6–2.9) | 2.2±1.04 (1.5-3.1) | 0 |  |  |
| P50 S2 amplitude, uV | 1.5±0.82 (1.2–1.8) | 1.2±0.72 (0.9-1.5) | 0 |  |  |
| **ASSR Power, dB** | -0.7±0.42 (-1–-0.4) | -0.5±0.43 (-0.8--0.2) | 15 | 0.0077 - 0.048 | -0.69 - -0.56 |
| **ASSR Phase synchrony, a.u.** | 0.2±0.1 (0.2–0.3) | 0.3±0.13 (0.2-0.4) | 20 | 0.0013 - 0.046 | -0.73 - -0.54 |
