# Supplementary material for: Non-rapid eye movement sleep and wake neurophysiology in schizophrenia
Source: eLife. 2022 May 17;11:e76211. doi: 10.7554/eLife.76211 (PMC9113745; doi:10.7554/eLife.76211)
Supplement: Supplementary file 2. [file elife-76211-supp2.docx]

**Supplemental file 2**

**Non-rapid eye movement sleep and wake neurophysiology in schizophrenia**

**Authors:** Nataliia Kozhemiako1†, Jun Wang2†, Chenguang Jiang2†, Lei A. Wang3, Guan-chen Gai2, Kai Zou2, Zhe Wang2, Xiao-man Yu2, Lin Zhou3, Shen Li4, Zhenglin Guo3, Robert G. Law1, James Coleman3, Dimitrios Mylonas5, Lu Shen7, Guoqiang Wang2, Shuping Tan6, Shengying Qin7, Hailiang Huang3,8, Michael Murphy4, Robert Stickgold9,10, Dara S. Manoach5, Zhenhe Zhou2•, Wei Zhu2•, Mei-Hua Hall4•, Shaun M. Purcell1,10•* & Jen Q. Pan3•*

**Affiliations:**

1. Department of Psychiatry, Brigham and Women’s Hospital, Harvard Medical School; Boston, USA
2. The Affiliated Wuxi Mental Health Center of Nanjing Medical University; Wuxi, China
3. Stanley Center for Psychiatric Research, Broad Institute of MIT and Harvard; Boston, USA
4. Department of Psychiatry, McLean Hospital, Harvard Medical School; Boston, USA
5. Department of Psychiatry, Massachusetts General Hospital, Harvard Medical School; Boston, USA
6. Huilong Guan Hospital, Beijing University; Beijing China
7. Bio-X Institutes, Shanghai Jiao Tong University; Shanghai China
8. ATGU, MGH, Harvard Medical School; Boston, USA
9. Beth Israel Deaconess Medical Center; Boston, USA
10. Department of Psychiatry, Harvard Medical School; Boston, USA

† - co-first authors; • - co-senior authors

* - corresponding authors (Jen Q. Pan, jpan@broadinstitute.org ; Shaun M. Purcell, smpurcell@bwh.harvard.edu)

***Supplementary file 2a: Prescribed medications in the SCZ sample***

| **Medication** | **Number of subjects (total 72*)** |
| --- | --- |
| ***Antipsychotics*** | 69 |
| Amisulpride | 22 |
| Chlorpromazine Hydrochloride | 1 |
| Aripiprazole | 12 |
| Olanzapine | 26 |
| Clozapine | 12 |
| Quetiapine Fumarate | 6 |
| Risperidone | 14 |
| Paliperidone (sustained release) | 1 |
| ***Emotion stabilizer and Antiepileptic*** | 17 |
| ***Anticholinergics*** | 10 |
| ***Sedatives and Tranquilizers*** | 13 |
| ***Antidepressants*** | 4 |

*- due to 4 subjects being removed there were 67 out of 68. The table above shows the full dataset

***Supplementary file 2b: Medication associations with EEG metrics within the SCZ sample***

| **EEG metric** | **CPZ equivalent antipsychotic dose**  **(n=67)** | **Antipsychotic medication** | | | | | | **Adjunctive medication** | | |
| --- | --- | --- | --- | --- | --- | --- | --- | --- | --- | --- |
| **Amisulpride**  **(n=22)** | **Aripiprazole**  **(n=12)** | **Olanzapine**  **(n=26)** | **Clozapine**  **(n=12)** | **Quetiapine Fumarate**  **(n=6)** | **Risperidone**  **(n=14)** | **Sedatives and tranquilizers**  **(n=13)** | **Mood stabilizers and antiepileptics**  **(n=17)** | **Anticholinergics**  **(n=10)** |
| SS Density (↓ in SCZ) |  |  |  | ↑ FPZ,FP1,FP2 | ↓ AF3,F7,T7 |  |  |  |  |  |
| FS Density (↓ in SCZ) |  |  |  |  | ↓ 9 channels |  |  |  |  |  |
| SS Amplitude (↓ in SCZ) |  |  |  |  | ↓ AFZ,T7 |  |  |  |  | ↑ P2,P4 |
| FS Amplitude (↓ in SCZ) |  |  |  |  |  |  |  |  | ↓ AFZ |  |
| SS ISA (↓ in SCZ) |  |  | ↑ F2,F4 |  | ↓ T7 |  |  |  |  |  |
| FS ISA (↓ in SCZ) |  |  |  |  |  |  |  |  |  |  |
| FS Duration (↓ in SCZ) |  |  |  |  | ↓ 7 channels |  |  |  |  |  |
| FS Chirp (↓ in SCZ) | ↑FC6, ↓TP8 |  |  |  | ↓ 8 channels | ↓ FC1 |  |  |  |  |
| SO Density (↑ in SCZ) |  |  |  |  |  |  |  |  |  |  |
| SO Duration (↑ in SCZ) |  |  |  |  |  |  |  | ↑ 10 channels |  |  |
| SO Slope (↓ in SCZ) |  |  |  |  |  |  |  | ↓ 8 channels | ↓ 23 channels |  |
| SS overlap with SO (↓ in SCZ) |  |  | ↑ 6 channels |  | ↑ CP5,CZ,F5 |  |  |  | ↓ 6 channels |  |
| SO phase angle when SS occur (↓ in SCZ) |  |  | ↑ POZ |  |  |  |  |  | ↓ CPZ,CZ | ↑ C3,C4,C5 |
| SO phase angle when FS occur (↓ in SCZ) |  |  |  |  |  |  |  |  |  | ↑ CP3 |
| PSD PC #4 (↓ in SCZ) |  |  |  |  | ↓ |  |  |  |  |  |
| PSI PC #1 (↑ in SCZ) |  |  |  |  |  |  |  |  |  |  |
| MMN Amplitude (↓ in SCZ) |  |  | ↑ AF4 |  |  |  |  |  |  |  |
| P50 S2/S1 ratio (↑ in SCZ) |  |  |  |  |  |  |  |  |  |  |
| ASSR Power (↓ in SCZ) |  |  |  |  |  |  |  |  |  |  |
| ASSR Phase synchrony (↓ in SCZ) |  |  |  | ↑ 5 channels |  |  |  |  |  | ↓ F8 |

*A linear regression model with formula EEG metric ~ medication + sex + age + error was fit for each channel for each EEG metric, where medication was a vector with continuous data for Chlorpromazine (CPZ) equivalent antipsychotic dose and a binary vector (True or False for medication use) for other columns. Channels where the association was significant (unadjusted p<0.01) are provided in the table together with the direction of effect (↓ or ↑ in an EEG metric with medication)*
